# Supplementary material for: Whole-genome sequencing in 333,100 individuals reveals rare non-coding single variant and aggregate associations with height
Source: PubMed Central journal article supplement (PMC11450065; doi:10.1038/s41467-024-52579-w), 2024-10-03
Supplement: 41467_2024_52579_MOESM3_ESM.pdf [file 41467_2024_52579_MOESM3_ESM.pdf]

## Description of Additional Supplementary Files

File Name: Supplementary Data 1

Description: Cohort descriptives for participants included in analyses from UK Biobank, All of Us and TOPMed

File Name: Supplementary Data 2

Description: List of known SNPs used for adjustment in association analyses

File Name: Supplementary Data 3

Description: Novel single variants associated with height identified in discovery analysis of UK Biobank

File Name: Supplementary Data 4

Description: Genome annotations of novel single variants associated with height

File Name: Supplementary Data 5

Description: Replication results from All of Us and TOPMed of novel height-associated single variants

File Name: Supplementary Data 6

Description: Coding aggregate associations identified in UK Biobank discovery analysis of height

File Name: Supplementary Data 7

Description: Non-coding aggregate associations identified in UK Biobank discovery analysis of height

File Name: Supplementary Data 8

Description: Single variant associations ( $MAC \geq 5$ ) contributing to the *HMGAI* upstream non-coding aggregate association

File Name: Supplementary Data 9

Description: Single variant associations ( $MAC \geq 5$ ) contributing to the *C17orf49* downstream non-coding aggregate association

File Name: Supplementary Data 10

Description: Association statistics for non-coding aggregates in the *C17orf49* locus

File Name: Supplementary Data 11

Description: Single variant associations ( $MAC \geq 5$ ) contributing to the *GHI* upstream non-coding aggregate association

File Name: Supplementary Data 12

Description: Replication results from All of Us and TOPMed of the *C17orf49* and *GHI* aggregate associations

File Name: Supplementary Data 13

Description: A full list of genomic annotations tested as aggregates
